# Supplementary material
Source: ML conference proceedings conference paper supplement (https://proceedings.neurips.cc/paper_files/paper/2022/hash/97b983c974551153d20ddfabb62a5203-Abstract.html)
Supplement: Supplementary file 1 [file 97b983c974551153d20ddfabb62a5203-Supplemental-Conference.pdf]

## Supplementary Material

### A Omitted Technical Preliminaries

Here we record definitions and facts that will be used in our proofs.

**Definition A.1** (Pairwise Correlation). The pairwise correlation of two distributions with probability mass functions (pmfs)  $D_1, D_2 : \{0, 1\}^M \rightarrow \mathbb{R}_+$  with respect to a distribution with pmf  $D : \{0, 1\}^M \rightarrow \mathbb{R}_+$ , where the support of  $D$  contains the supports of  $D_1$  and  $D_2$ , is defined as  $\chi_D(D_1, D_2) + 1 \stackrel{\text{def}}{=} \sum_{x \in \{0, 1\}^M} D_1(x)D_2(x)/D(x)$ . We say that a collection of  $s$  distributions  $\mathcal{D} = \{D_1, \dots, D_s\}$  over  $\{0, 1\}^M$  is  $(\gamma, \beta)$ -correlated relative to a distribution  $D$  if  $|\chi_D(D_i, D_j)| \leq \gamma$  for all  $i \neq j$ , and  $|\chi_D(D_i, D_j)| \leq \beta$  for  $i = j$ .

The following notion of dimension effectively characterizes the difficulty of the decision problem.

**Definition A.2** (SQ Dimension). For  $\gamma, \beta > 0$ , a decision problem  $\mathcal{B}(\mathcal{D}, D)$ , where  $D$  is fixed and  $\mathcal{D}$  is a family of distributions over  $\{0, 1\}^M$ , let  $s$  be the maximum integer such that there exists  $\mathcal{D}_D \subseteq \mathcal{D}$  such that  $\mathcal{D}_D$  is  $(\gamma, \beta)$ -correlated relative to  $D$  and  $|\mathcal{D}_D| \geq s$ . We define the *Statistical Query dimension* with pairwise correlations  $(\gamma, \beta)$  of  $\mathcal{B}$  to be  $s$  and denote it by  $\text{SD}(\mathcal{B}, \gamma, \beta)$ .

The connection between SQ dimension and lower bounds is captured by the following lemma.

**Lemma A.3** ([FGR<sup>+</sup>17]). Let  $\mathcal{B}(\mathcal{D}, D)$  be a decision problem, where  $D$  is the reference distribution and  $\mathcal{D}$  is a class of distributions over  $\{0, 1\}^M$ . For  $\gamma, \beta > 0$ , let  $s = \text{SD}(\mathcal{B}, \gamma, \beta)$ . Any SQ algorithm that solves  $\mathcal{B}$  with probability at least  $2/3$  requires at least  $s \cdot \gamma/\beta$  queries to the  $\text{STAT}(\sqrt{2}\gamma)$  oracles.

We have the following fact about the chi-squared inner product in the discrete setting.

**Fact A.4.** For distributions  $\mathbf{P}, \mathbf{Q}$  over  $\{0, 1\}^M$ , we have that  $1 + \chi_{U_M}(\mathbf{P}, \mathbf{Q}) = \sum_{T \subseteq [M]} \hat{\mathbf{P}}(T)\hat{\mathbf{Q}}(T)$ .

We will also use the following standard fact:

**Fact A.5.** Let  $m, M \in \mathbb{Z}_+$  with  $m < M$ . For any constant  $0 < c < 1$  and  $M > 2m/c$ , there exists a collection  $\mathcal{C}$  of  $2^{\Omega_c(m)}$  subsets  $S \subseteq [M]$  such that any pair  $S, S' \in \mathcal{C}$ , with  $S \neq S'$ , satisfies  $|S \cap S'| < cm$ .

In fact, an appropriate size set of random subsets satisfies the above statement with high probability.

The following correlation lemma states that the distributions  $\mathbf{P}_S^A$  are nearly orthogonal as long as  $A$  satisfies the nearly moment-matching condition.

**Lemma A.6** (Correlation Lemma [DKS22]). Let  $k, m, M \in \mathbb{Z}_+$  with  $k \leq m \leq M$ . If the distribution  $A$  on  $[m] \cup \{0\}$  satisfies Condition 3.3, then for all  $S, S' \subseteq [M]$  with  $|S| = |S'| = m$ , we have that

$$|\chi_{U_M}(\mathbf{P}_S^A, \mathbf{P}_{S'}^A)| \leq (|S \cap S'|/m)^{k+1} \chi^2(A, \text{Bin}(m, 1/2)) + k\nu^2. \quad (1)$$

### B Omitted Proofs from Section 3

#### B.1 Proof of Proposition 3.5

Let  $\mathcal{C}$  be a collection of  $s = 2^{\Omega(m)}$  subsets  $S \subseteq [M]$  with  $|S| = m$  whose pairwise intersections are all less than  $m/2$ . By Fact A.5 (taking the local parameter  $c = 1/2$ ), such a set is guaranteed to exist. We then need to show that for  $S, S' \in \mathcal{C}$ , we have that  $|\chi_{U_M^p}(\mathbf{P}_{S,a,b}^{A,B,p}, \mathbf{P}_{S',a,b}^{A,B,p})|$  is small. Since  $U_M^p, \mathbf{P}_{S,a,b}^{A,B,p}$ , and  $\mathbf{P}_{S',a,b}^{A,B,p}$  all assign  $y = 1$  with probability  $p$ , it is not hard to see that

$$\begin{aligned} \chi_{U_M^p}(\mathbf{P}_{S,a,b}^{A,B,p}, \mathbf{P}_{S',a,b}^{A,B,p}) &= p \chi_{U_M^p|y=1} \left( (\mathbf{P}_{S,a,b}^{A,B,p} | y=1), (\mathbf{P}_{S',a,b}^{A,B,p} | y=1) \right) + \\ &\quad (1-p) \chi_{U_M^p|y=-1} \left( (\mathbf{P}_{S,a,b}^{A,B,p} | y=-1), (\mathbf{P}_{S',a,b}^{A,B,p} | y=-1) \right) \\ &= p \chi_{U_M}(\mathbf{P}_S^A, \mathbf{P}_{S'}^A) + (1-p) \chi_{U_M}(\mathbf{P}_S^B, \mathbf{P}_{S'}^B). \end{aligned}$$

By Lemma A.6, for  $S, S' \in \mathcal{C}$  with  $S \neq S'$ , it holds that

$$\chi_{U_M^p}(\mathbf{P}_{S,a,b}^{A,B,p}, \mathbf{P}_{S',a,b}^{A,B,p}) \leq k\nu^2 + 2^{-k}(\chi^2(A, \text{Bin}(m, 1/2)) + \chi^2(B, \text{Bin}(m, 1/2))) \leq \tau.$$

If  $S = S'$ , a similar computation shows that

$$\chi_{U_M^p}(\mathbf{P}_{S,a,b}^{A,B,p}, \mathbf{P}_{S,a,b}^{A,B,p}) = \chi^2(\mathbf{P}_{S,a,b}^{A,B,p}, U_M^p) \leq \chi^2(A, \text{Bin}(m, 1/2)) + \chi^2(B, \text{Bin}(m, 1/2)).$$

Let  $\gamma = \tau$  and  $\beta = \chi^2(A, \text{Bin}(m, 1/2)) + \chi^2(B, \text{Bin}(m, 1/2))$ . We have that the Statistical Query dimension of this testing problem with correlations  $(\gamma, \beta)$  is at least  $s$ . Then applying Lemma A.3 with  $(\gamma, \beta)$  completes the proof.

## B.2 Proof of Lemma 3.8

The conditions on  $\mu$  define a linear program (LP). We will show that this LP is feasible by showing that the dual LP is infeasible. The dual LP asks for a degree at most  $k$  real polynomial  $q(x)$  such that

$$|q(0)| \geq (1/11) \sum_{i=1-s}^{s-1} |q(i)|.$$

Consider the parameterization  $p(\theta) = q(s \sin(\theta))$ . We will leverage the fact that  $p(\theta)$  is a degree- $k$  polynomial in  $e^{i\theta}$  and  $e^{-i\theta}$ . In particular,  $p(\theta)$  can be written as

$$p(\theta) = \sum_{j=-k}^k a_j e^{ij\theta},$$

for some complex coefficients  $a_j \in \mathbb{C}$ . By normalizing, we can assume that  $\sum_{j=-k}^k |a_j|^2 = 1$ . Then, for any  $\theta$ , we have that

$$|p(\theta)| \leq \sum_{j=-k}^k |a_j| = O(\sqrt{k}),$$

where the final inequality follows from the Cauchy-Schwarz. In particular,  $|q(0)| = |p(0)| = O(\sqrt{k})$ . In addition, for any  $\theta$ , by Cauchy-Schwarz, we have that

$$|p'(\theta)| = \left| \sum_{j=-k}^k j a_j e^{ij\theta} \right| \leq \sum_{j=-k}^k |j| |a_j| \leq \sqrt{\sum_{j=-k}^k j^2} = O(k^{3/2}).$$

Finally, we note that

$$\frac{1}{2\pi} \int_0^{2\pi} |p(\theta)|^2 d\theta = \sum_{j=-k}^k |a_j|^2 = 1.$$

Combining the latter with the fact that  $|p(\theta)| = O(\sqrt{k})$ , we obtain that

$$\int_0^{2\pi} |p(\theta)| d\theta = \Omega(k^{-1/2}).$$

For any  $\theta \in [0, 2\pi]$ , let  $n(\theta)$  be the closest  $\phi \in [0, 2\pi]$  such that  $s \sin(\phi)$  is an integer in  $\{1-s, 2-s, \dots, s-1\}$ . It is not hard to see that  $|n(\theta) - \theta| = O(s^{-1/2})$  for all such  $\theta$ . Furthermore, we have that

$$|p(n(\theta)) - p(\theta)| \leq |n(\theta) - \theta| \sup_{\theta' \in [0, 2\pi]} |p'(\theta')| \leq O(k^{3/2} s^{-1/2}).$$

We can thus write

$$\Omega(k^{-1/2}) = \int_0^{2\pi} |p(\theta)| d\theta \leq \int_0^{2\pi} |p(n(\theta))| d\theta + O(k^{3/2} s^{-1/2}).$$

Therefore,

$$\int_0^{2\pi} |p(n(\theta))| d\theta \geq \Omega(k^{-1/2}).$$

On the other hand, each value of  $p(n(\theta))$  is equal to the value of  $q$  evaluated at some integer between  $1 - s$  and  $s - 1$ . Furthermore, it is not hard to see that each such integer occurs for at most a total of  $O(s^{-1/2})$  range of  $\theta$ 's. Therefore, we get that

$$O(s^{-1/2}) \sum_{i=1-s}^{s-1} |q(i)| \geq \Omega(k^{-1/2}).$$

Combining with the fact that  $|q(0)| = O(k^{1/2})$ , this shows that it is impossible that

$$|q(0)| \geq 1/4 \sum_{i=1-s}^{s-1} |q(i)|.$$

This completes our proof.

## C Omitted Proofs from Section 4

### C.1 Proof of Claim 4.2

For a  $\mathbf{v}_S$  the vector whose  $i^{\text{th}}$  coordinate is 1 if  $i \in S$  and 0 otherwise, let  $g : \{0, 1\}^{m'} \rightarrow \{\pm 1\}$  be defined as  $g(\mathbf{x}) = -1$  if and only if  $\mathbf{v}_S^T \mathbf{x} \in J$ . In this way, we are able to write  $g$  as a degree- $2d$  PTF, i.e.,  $g(\mathbf{x}) = \text{sign}(\prod_{z \in J} (\mathbf{v}_S^T \mathbf{x} - z)^2)$ . Therefore, there exists some LTF  $L : \mathbb{R}^M \rightarrow \{\pm 1\}$  such that  $g(\mathbf{x}) = L(\mathbf{x}') = L(V_{2d}(\mathbf{x}))$  for all  $\mathbf{x}$ . We now bound the error for LTF  $L$  under the distribution  $(\mathbf{X}', Y')$ . By the law of total probability, we have that

$$\begin{aligned} \Pr_{(\mathbf{X}', Y')} [Y' \neq L(\mathbf{X}')] &= \Pr_{(\mathbf{X}, Y)} [Y \neq g(\mathbf{X})] \\ &\leq \Pr_{(\mathbf{X}, Y)} [Y \neq g(\mathbf{X}) \mid Y = 1] + \Pr_{(\mathbf{X}, Y)} [Y \neq g(\mathbf{X}) \mid Y = -1]. \end{aligned}$$

We note that our hard distribution returns  $(\mathbf{x}', y')$  with  $y' = L(\mathbf{x}')$ , unless it picked a sample corresponding to a sample of  $\mathcal{D}_-$  coming from  $\bar{J}$ , therefore,

$$\Pr_{(\mathbf{X}', Y')} [Y' \neq L(\mathbf{X}')] \leq \Pr_{(\mathbf{X}, Y)} [Y \neq g(\mathbf{X}) \mid Y = -1] \leq \zeta,$$

which implies that  $\text{OPT}_{\text{Mass}} \leq \zeta \leq \exp(-\Omega(\log(M)^{8/9}))$ . We then show that  $(\mathbf{X}', Y')$  is a Massart LTF distribution with noise rate upper bound of  $\eta = 1/3$ . For any fixed  $\mathbf{x}' \in \mathbb{R}^M$ , we have that

$$\begin{aligned} \frac{\Pr_{(\mathbf{X}', Y')} [Y' = 1 \mid \mathbf{X}' = \mathbf{x}']}{\Pr_{(\mathbf{X}', Y')} [Y' = -1 \mid \mathbf{X}' = \mathbf{x}']} &= \frac{\Pr_{(\mathbf{X}, Y)} [Y = 1 \mid \mathbf{X} = \mathbf{x}]}{\Pr_{(\mathbf{X}, Y)} [Y = -1 \mid \mathbf{X} = \mathbf{x}]} \\ &= \frac{\Pr_{(\mathbf{X}, Y)} [Y = 1] \cdot \Pr_{(\mathbf{X}, Y)} [\mathbf{X} = \mathbf{x} \mid Y = 1]}{\Pr_{(\mathbf{X}, Y)} [Y = -1] \cdot \Pr_{(\mathbf{X}, Y)} [\mathbf{X} = \mathbf{x} \mid Y = -1]} = \frac{\|\mathcal{D}_+\|_1 \cdot \mathbf{P}_S^{\mathcal{D}_+}(\mathbf{x})}{\|\mathcal{D}_-\|_1 \cdot \mathbf{P}_S^{\mathcal{D}_-}(\mathbf{x})} = \frac{\mathcal{D}_+(\mathbf{v}_S^T \mathbf{x})}{\mathcal{D}_-(\mathbf{v}_S^T \mathbf{x})}. \end{aligned}$$

Therefore, if  $\mathbf{v}_S^T \mathbf{x} \in J$ , the above ratio will be 0 and  $L(\mathbf{x}') = -1$ , which means that the noise rate  $\eta(\mathbf{x}') = 0$ ; otherwise the above ratio will be at least 2 (since  $\mathcal{D}_+ > 2\mathcal{D}_-$  on  $\bar{J}$  by property 1(b) of Proposition 3.6) and  $L(\mathbf{x}') = 1$ , which means that  $\eta(\mathbf{x}') \leq 1/3$ . This completes the proof of the claim.

### C.2 Proof of Claim 4.5

Let  $\mathbf{v}_S$  be the vector whose  $i^{\text{th}}$  coordinate is 1 if  $i \in S$  and 0 otherwise. By Lemma 4.4, there is a real univariate polynomial  $p$  of degree  $O(d)$  such that  $p(\mathbf{v}_S^T \mathbf{x}) = 1$ ,  $\mathbf{v}_S^T \mathbf{x} \in J$  and  $p(\mathbf{v}_S^T \mathbf{x}) \leq 0$ ,  $\mathbf{v}_S^T \mathbf{x} \notin J$ . Let  $g(\mathbf{x}) := \widehat{\text{ReLU}}(p(\mathbf{v}_S^T \mathbf{x}))$ . Since the absolute value of every coefficient of  $p$  is at most  $m^{O(d)} = \text{poly}(M)$ , by our definition, the total weight of the corresponding neuron  $g$  is at most  $m^{O(d)} = \text{poly}(M)$ . Therefore, there exists some  $\widehat{\text{ReLU}}$  function  $L : \mathbb{R}^M \rightarrow \mathbb{R}$  such

that  $g(\mathbf{x}) = L(\mathbf{x}') = L(V_{O(d)}(\mathbf{x}))$  for all  $\mathbf{x}$ . We now bound the error for  $L$  under the distribution  $(\mathbf{X}', Y')$ . By the law of total expectation, we have that

$$\begin{aligned} \mathbf{E}_{(\mathbf{X}', Y')} [(Y' - L(\mathbf{X}'))^2] &= \mathbf{E}_{(\mathbf{X}, Y)} [(Y - g(\mathbf{X}))^2] \\ &\leq \mathbf{E}_{(\mathbf{X}, Y)} [(Y - g(\mathbf{X}))^2 \mid Y = 1] + \mathbf{E}_{(\mathbf{X}, Y)} [(Y - g(\mathbf{X}))^2 \mid Y = -1] . \end{aligned}$$

We note that our hard distribution returns  $(\mathbf{X}', Y')$  with  $Y' = L(\mathbf{X}')$ , unless it picked a sample corresponding to a sample of  $\mathcal{D}_-$  coming from  $\bar{J}$ , therefore,

$$\mathbf{E}_{(\mathbf{X}', Y')} [(Y' - L(\mathbf{X}'))^2] \leq \mathbf{E}_{(\mathbf{X}, Y)} [(Y - g(\mathbf{X}))^2 \mid Y = 1] \leq 4\zeta .$$

which implies that  $\text{OPT}_{\text{Mass}} \leq 4\zeta \leq \exp(-\Omega(\log(M)^{8/9}))$ . We then show that  $(\mathbf{X}', Y')$  is a Massart single neuron distribution with  $\widehat{\text{ReLU}}$  activation and with noise rate upper bound of  $\eta = 1/3$ . For any fixed  $\mathbf{x}' \in \mathbb{R}^M$ , we have that

$$\begin{aligned} \frac{\Pr_{(\mathbf{X}', Y')} [Y' = -1 \mid \mathbf{X}' = \mathbf{x}']}{\Pr_{(\mathbf{X}', Y')} [Y' = 1 \mid \mathbf{X}' = \mathbf{x}']} &= \frac{\Pr_{(\mathbf{X}, Y)} [Y = -1 \mid \mathbf{X} = \mathbf{x}]}{\Pr_{(\mathbf{X}, Y)} [Y = 1 \mid \mathbf{X} = \mathbf{x}]} \\ &= \frac{\Pr_{(\mathbf{X}, Y)} [Y = -1] \cdot \Pr_{(\mathbf{X}, Y)} [\mathbf{X} = \mathbf{x} \mid Y = -1]}{\Pr_{(\mathbf{X}, Y)} [Y = 1] \cdot \Pr_{(\mathbf{X}, Y)} [\mathbf{X} = \mathbf{x} \mid Y = 1]} = \frac{\|\mathcal{D}_+\|_1 \cdot \mathbf{P}_S^{\mathcal{D}_+}(\mathbf{x})}{\|\mathcal{D}_-\|_1 \cdot \mathbf{P}_S^{\mathcal{D}_-}(\mathbf{x})} = \frac{\mathcal{D}_+(\mathbf{v}_S^T \mathbf{x})}{\mathcal{D}_-(\mathbf{v}_S^T \mathbf{x})} . \end{aligned}$$

Therefore, if  $\mathbf{v}_S^T \mathbf{x} \in J$ , the above ratio will be 0 and  $L(\mathbf{x}') = -1$ , which means that the noise rate  $\eta(\mathbf{x}') = 0$ ; otherwise the above ratio will be at least 2 (since  $\mathcal{D}_+ > 2\mathcal{D}_-$  on  $\bar{J}$  by property 1(b) of Proposition 3.6) and  $L(\mathbf{x}') = 1$ , which means that  $\eta(\mathbf{x}') \leq 1/3$ . This completes the proof of the claim.

## D SQ Hardness of Learning a Single Neuron with $L_2$ -Massart Noise

In this section, we prove our SQ hardness result of learning a single neuron with fast convergent activations and  $L_2$ -Massart noise. Without loss of generality, we consider activations which converge on the negative side. For such an activation  $f$ , let  $f_- := f(-\infty)$  and  $c_+$  be a constant such that  $f(c_+) \neq f_-$ . The main theorem of this section is the following.

**Theorem D.1** (SQ Hardness of  $L_2$ -Massart Learning). *Let  $f : \mathbb{R} \rightarrow \mathbb{R}$  be a fast convergent activation. Any SQ algorithm that learns a single neuron with activation  $f$  on  $\mathbb{R}^M$ , in the presence of  $\eta$ - $L_2$ -Massart noise with  $\eta = \frac{2(f(c_+) - f_-)^2}{9}$ , to squared error better than  $1/\text{poly}(\log(M))$  requires either queries of accuracy better than  $\tau := \exp(-\Omega(\log(M)^{1.05}))$  or at least  $1/\tau$  statistical queries. This holds even if:*

1. The optimal neuron has squared error  $\text{OPT}_{\text{Mass-L}_2} \leq \exp(-\Omega(\log(M)^{8/9}))$ ,
2. The  $\mathbf{X}$  values are supported on  $\{0, 1\}^M$ , and
3. The total weight of the neuron is  $\text{poly}(M)$ .

*Proof.* Our proof will make use of the SQ framework of Section 3.1 and will crucially rely on the one-dimensional construction of Proposition 3.6. In this section, we fix the labels  $a = f_-$ ,  $b = f(c_+)$ , and apply the construction in Section 3.3 to obtain the joint distributions  $(\mathbf{X}, Y)$  and  $(\mathbf{X}', Y')$ . Note that  $y = y'$  and there is a known 1-1 mapping between  $\mathbf{x}$  and  $\mathbf{x}'$ , therefore finding a hypothesis that predicts  $y'$  given  $\mathbf{x}'$  is equivalent to finding a hypothesis for  $y$  given  $\mathbf{x}$ .

**Claim D.2.** *The distribution  $(\mathbf{X}', Y')$  on  $\{0, 1\}^M \times \{f_-, f(c_+)\}$  is an  $L_2$ -Massart single neuron distribution with respect to activation  $f$ , it has optimal squared error  $\text{OPT}_{\text{Mass-L}_2} \leq \exp(-\Omega(\log(M)^{8/9}))$  and  $L_2$ -Massart noise rate upper bound of  $\eta = \frac{2(f(c_+) - f_-)^2}{9}$ .*

*Proof.* We assume  $M > |c_+|$  to be sufficiently large. Let  $\mathbf{v}_S$  be the vector whose  $i^{\text{th}}$  coordinate is 1 if  $i \in S$  and 0 otherwise. By Lemma 4.4, there is a real univariate polynomial  $q(x)$  of degree  $O(d)$  such that  $q(x) = 1, \forall x \in J$  and  $q(x) \leq 0, \forall x \in \bar{J}$ . Let  $p(x) = (c_+ + M)q(x) - M$  and  $g(\mathbf{x}) = f(p(\mathbf{v}_S^T \mathbf{x}))$ . By definition, we have that  $p(x) = c_+$  for  $x \in J$  and  $p(x) \leq -M$  for  $x \in \bar{J}$ .

Since the absolute value of every coefficient of  $p$  is at most  $m^{O(d)} = \text{poly}(M)$ , the weight of the corresponding neuron  $g$  is at most  $m^{O(d)} = \text{poly}(M)$ . Therefore, there exists some fast convergent activation  $L : \mathbb{R}^M \rightarrow \mathbb{R}$  such that  $g(\mathbf{x}) = L(\mathbf{x}') = L(V_{O(d)}(\mathbf{x}))$  for all  $\mathbf{x}$ . We now bound the error for  $L$  under the distribution  $(\mathbf{X}', Y')$ . We note that conditional on  $Y = f_-$ , we will always have that  $\mathbf{v}_S^T \mathbf{x} \notin J$  and conditional on  $Y = f(c_+)$ , we will have that  $\mathbf{v}_S^T \mathbf{x} \notin J$  with probability at most  $\zeta$ . Therefore, by the law of total expectation, we have that

$$\begin{aligned} \mathbf{E}_{(\mathbf{X}', Y')}[(Y' - L(\mathbf{X}))^2] &= \mathbf{E}_{(\mathbf{X}, Y)}[(Y - g(\mathbf{X}))^2] \\ &\leq \mathbf{E}_{(\mathbf{X}, Y)}[(Y - g(\mathbf{X}))^2 \mid Y = f_-] + \mathbf{E}_{(\mathbf{X}, Y)}[(Y - g(\mathbf{X}))^2 \mid Y = f(c_+)] \\ &\leq \mathbf{E}_{(\mathbf{X}, Y)}[(f_- - g(\mathbf{X}))^2 \mid Y = f_-] + 2\zeta \mathbf{E}_{(\mathbf{X}, Y)}[(f_- - f(c_+))^2 + (f_- - g(\mathbf{X}))^2 \mid \mathbf{v}_S^T \mathbf{X} \notin J, Y = f(c_+)] \\ &\leq 1/\text{poly}(M) + 2\zeta \cdot (1/\text{poly}(M) + (f_- - f(c_+))^2) \\ &\leq \exp(-\Omega(\log(M)^{8/9})) + \exp(-\Omega(\log(M)^{8/9})) \cdot (1/\text{poly}(M) + (f_- - f(c_+))^2) \\ &\leq \exp(-\Omega(\log(M)^{8/9})), \end{aligned}$$

where the third inequality follows from the definition of fast convergent activation. Therefore, we have that  $\text{OPT}_{\text{Mass-L2}} \leq \exp(-\Omega(\log(M)^{8/9}))$ . We then show that  $(\mathbf{X}', Y')$  is a  $L_2$ -Massart single neuron distribution with activation  $f$  and with noise rate upper bound of  $\eta = \frac{2(f(c_+) - f_-)^2}{9}$ . Note that for any  $\mathbf{x} \in \mathbb{R}^{m'}$ , if  $\mathbf{v}_S^T \mathbf{x} \in J$ , then  $g(\mathbf{x}) = f(p(\mathbf{v}_S^T \mathbf{x})) = f(c_+)$  and  $Y$  will always be  $f(c_+)$ , which implies that the error will always be 0. Hence, we assume that  $\mathbf{v}_S^T \mathbf{x} \notin J$  and have that

$$\begin{aligned} \frac{\Pr_{(\mathbf{X}, Y)}[Y = f_- \mid \mathbf{X} = \mathbf{x}]}{\Pr_{(\mathbf{X}, Y)}[Y = f(c_+) \mid \mathbf{X} = \mathbf{x}]} &= \frac{\Pr_{(\mathbf{X}, Y)}[Y = f_-] \cdot \Pr_{(\mathbf{X}, Y)}[\mathbf{X} = \mathbf{x} \mid Y = f_-]}{\Pr_{(\mathbf{X}, Y)}[Y = f(c_+)] \cdot \Pr_{(\mathbf{X}, Y)}[\mathbf{X} = \mathbf{x} \mid Y = f(c_+)]} \\ &= \frac{\|\mathcal{D}_+\|_1 \cdot \mathbf{P}_S^{\mathcal{D}_+}(\mathbf{x})}{\|\mathcal{D}_-\|_1 \cdot \mathbf{P}_S^{\mathcal{D}_-}(\mathbf{x})} = \frac{\mathcal{D}_+(\mathbf{v}_S^T \mathbf{x})}{\mathcal{D}_-(\mathbf{v}_S^T \mathbf{x})} \geq 2, \end{aligned}$$

which implies that  $\Pr_{(\mathbf{X}, Y)}[Y = f(c_+) \mid \mathbf{X} = \mathbf{x}] \leq 1/3$ . Therefore,

$$\begin{aligned} \mathbf{E}_{(\mathbf{X}', Y')}[(Y' - L(\mathbf{X}'))^2 \mid \mathbf{X}' = \mathbf{x}'] &= \mathbf{E}_{(\mathbf{X}, Y)}[(Y - g(\mathbf{X}))^2 \mid \mathbf{X} = \mathbf{x}] \\ &= (f(c_+) - g(\mathbf{x}))^2 \Pr_{(\mathbf{X}, Y)}[Y = f(c_+) \mid \mathbf{X} = \mathbf{x}] + (f_- - g(\mathbf{x}))^2 \Pr_{(\mathbf{X}, Y)}[Y = f_- \mid \mathbf{X} = \mathbf{x}] \\ &\leq \frac{(f(c_+) - g(\mathbf{x}))^2}{3} + (f_- - g(\mathbf{x}))^2 \leq \frac{2((f(c_+) - f_-)^2 + (f_- - g(\mathbf{x}))^2)}{3} + (f_- - g(\mathbf{x}))^2 \\ &\leq \frac{2(f(c_+) - f_-)^2}{3} + 1/\text{poly}(M) \leq \frac{8(f(c_+) - f_-)^2}{9}, \end{aligned}$$

where the third inequality follows from  $\mathbf{v}_S^T \mathbf{x} \notin J$  and the definition of fast convergent activation. This completes the proof of the claim.  $\square$

We now show that the  $(\mathcal{D}_+, \mathcal{D}_-, f_-, f(c_+), m')$ -Hidden Junta Testing Problem efficiently reduces to our learning task. In more detail, we show that any SQ algorithm that computes a hypothesis  $h'$  satisfying  $\mathbf{E}_{(\mathbf{X}', Y')}[(h'(\mathbf{X}') - Y')^2] < p(1-p)(f_- - f(c_+))^2 - 2\sqrt{2\tau}$  can be used as a black-box to distinguish between  $\mathbf{P}_{S, a, b}^{\mathcal{D}_+, \mathcal{D}_- \cdot p}$ , for some unknown subset  $S \subseteq [m']$  with  $|S| = m$ , and  $U_{m'}^p$ . Since there is a 1-1 mapping between  $\mathbf{x} \in \{0, 1\}^{m'}$  and  $\mathbf{x}' \in \{0, 1\}^M$ , we denote  $h : \{0, 1\}^{m'} \mapsto \mathbb{R}$  to be  $h(\mathbf{x}) = h'(\mathbf{x}')$ . We note that we can (with one additional query to estimate the  $\mathbf{E}[(h'(\mathbf{X}') - Y')^2]$  within error  $\sqrt{2\tau}$ ) distinguish between (i) the distribution  $\mathbf{P}_{S, a, b}^{\mathcal{D}_+, \mathcal{D}_- \cdot p}$ , and (ii) the distribution  $U_{m'}^p$ . This is because for any  $h$  we have that

$$\begin{aligned} \mathbf{E}_{(\mathbf{X}, Y) \sim U_{m'}^p}[(h(\mathbf{X}) - Y)^2] &= \mathbf{E}_{(\mathbf{X}, Y) \sim U_{m'}^p}[h(\mathbf{X})^2] - 2\mathbf{E}_{(\mathbf{X}, Y) \sim U_{m'}^p}[h(\mathbf{X})]\mathbf{E}_{(\mathbf{X}, Y) \sim U_{m'}^p}[Y] \\ &\quad + \mathbf{E}_{(\mathbf{X}, Y) \sim U_{m'}^p}[Y^2] \\ &\geq \mathbf{E}_{(\mathbf{X}, Y) \sim U_{m'}^p}[h(\mathbf{X})]^2 - 2\mathbf{E}_{(\mathbf{X}, Y) \sim U_{m'}^p}[h(\mathbf{X})]\mathbf{E}_{(\mathbf{X}, Y) \sim U_{m'}^p}[Y] \\ &\quad + \mathbf{E}_{(\mathbf{X}, Y) \sim U_{m'}^p}[Y^2] \\ &\geq \mathbf{E}_{(\mathbf{X}, Y) \sim U_{m'}^p}[Y^2] - \mathbf{E}_{(\mathbf{X}, Y) \sim U_{m'}^p}[Y]^2 = p(1-p)(f_- - f(c_+))^2. \end{aligned}$$

Applying Proposition 3.5, we determine that any SQ algorithm which, given access to a distribution  $\mathbf{P}$  so that either  $\mathbf{P} = U_{m'}^p$ , or  $\mathbf{P}$  is given by  $\mathbf{P}_{S,a,b}^{\mathcal{D}^+, \mathcal{D}^-, p}$  for some unknown subset  $S \subseteq [m']$  with  $|S| = m$ , correctly distinguishes between these two cases with probability at least  $2/3$  must either make queries of accuracy better than  $\sqrt{2\tau}$  or must make at least  $2^{\Omega(m)}\tau/(\chi^2(A, \text{Bin}(m, 1/2)) + \chi^2(B, \text{Bin}(m, 1/2)))$  statistical queries. Therefore, it is impossible for an SQ algorithm to learn a hypothesis with error better than  $p(1-p)(f_- - f(c_+))^2 - 2\sqrt{2\tau} = \Theta(1/s) - \Theta(\sqrt{\tau}) = 1/\text{polylog}(M)$  without either using queries of accuracy better than  $\tau$  or making at least  $2^{\Omega(m)}\tau/\text{polylog}(M) > 1/\tau$  many queries. This completes the proof of Theorem D.1.  $\square$
